# Supplementary material for: A multi-modal exploration of heterogeneous physico–chemical properties of DCIS breast microcalcifications
Source: Royal Society of Chemistry journal article supplement (doi:10.1039/d1an01548f), 2022-01-01
Supplement: d1an01548f1.pdf [file d1an01548f1.pdf]

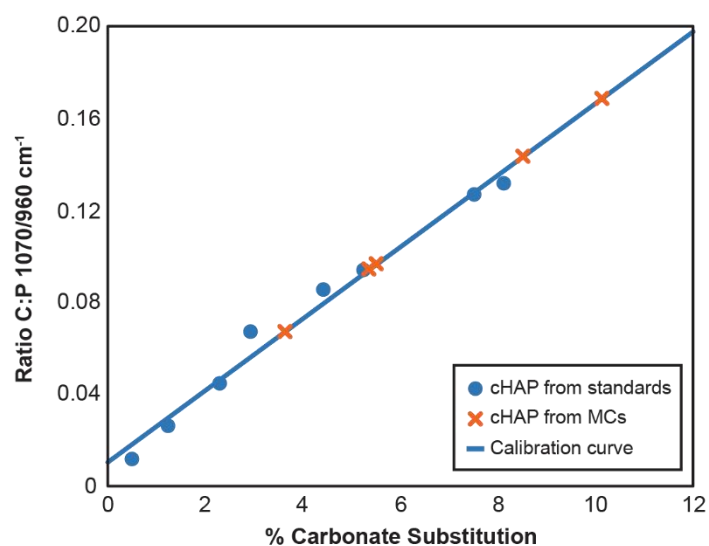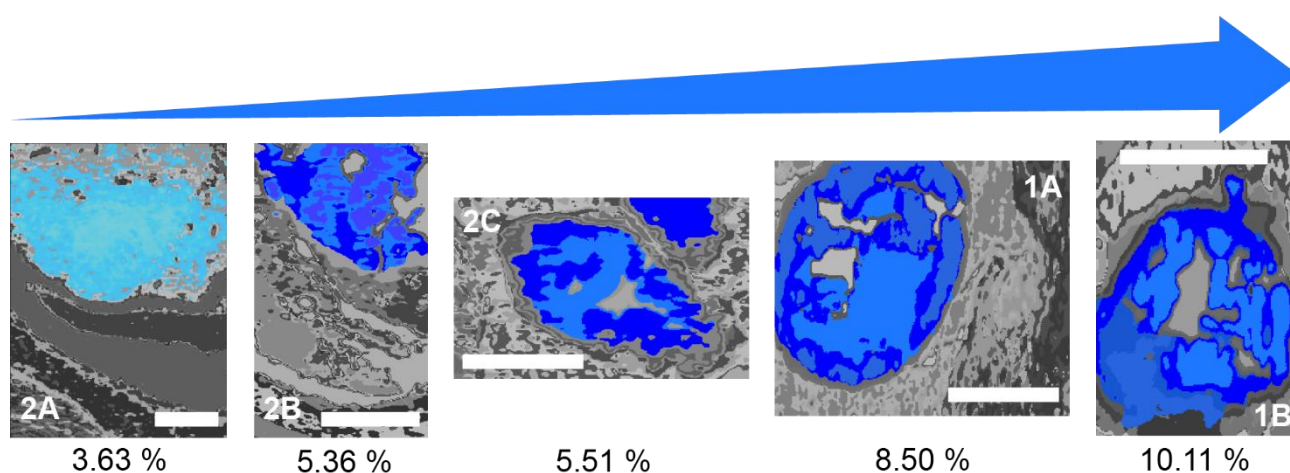

**Supp. Fig. 1 Calibration curve for carbonate in Raman analysis.** (top) Calibration curve constructed from measurement of HAP standards with known carbonate substitution, where the ratio of the areas of the 1070 cm<sup>-1</sup> and 960 cm<sup>-1</sup> peaks was measured and used to estimate carbonate substitution in each calcification. (bottom) location of carbonate HAP in each calcification with mean carbonate weight. Scale bars = 150 μm.
